# Supplementary material for: Long-term outcomes in patients with advanced melanoma who had initial stable disease with pembrolizumab in KEYNOTE-001 and KEYNOTE-006
Source: PubMed Central journal article supplement — Eur J Cancer. Author manuscript; Available in PMC 2022 Aug 4. (PMC9350885; doi:10.1016/j.ejca.2021.08.013), 2021-09-25
Supplement: NIHMS1820504-supplement-supplementat_data_1.pdf [file NIHMS1820504-supplement-supplementat_data_1.pdf]

**Supplementary Figure 1.** Subsequent response in patients with complete response (CR), partial response (PR), or SD at week 12 who were included in the week 12 analysis population.<sup>a</sup>

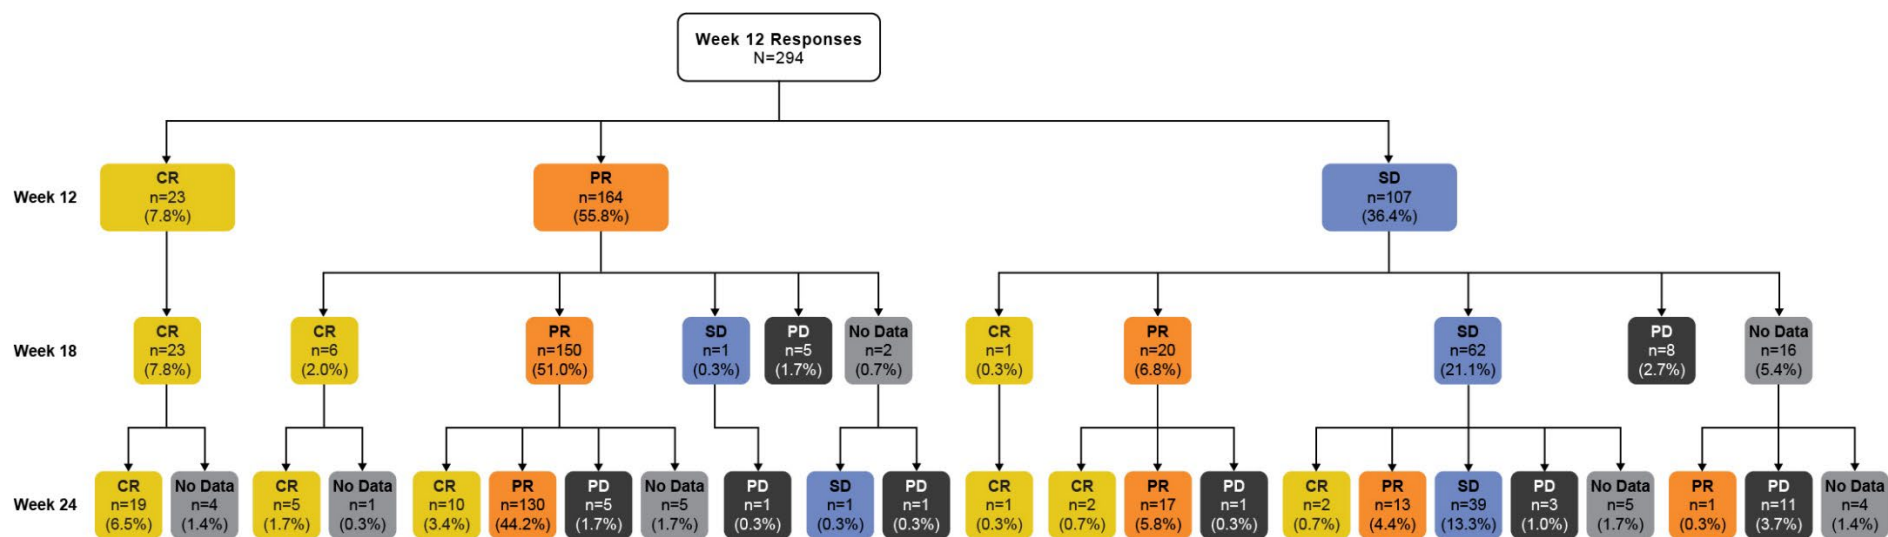

<sup>a</sup>Data are presented as percentage of the total week 12 analysis population (N = 294).
